1 **Bacterial composition reflects fine-scale salinity changes while phylogenetic diversity**  
2 **exhibits a strong salt divide**

3

4 Ariane L. Peralta<sup>1\*</sup>, Mario E. Muscarella<sup>2</sup>, Alexandra Stucy<sup>1</sup>, Jo A. Werba<sup>1,3</sup>, Michael W.  
5 McCoy<sup>1,4</sup>

6

7

8 <sup>1</sup>Department of Biology, East Carolina University, Howell Science Complex, Greenville, NC  
9 27858, USA; <sup>2</sup>Department of Biology and Wildlife, Institute of Arctic Biology, University of Alaska  
10 Fairbanks, Fairbanks, AK, 99775, USA; <sup>3</sup>Department of Biology, McMaster University, 1280  
11 Main Street West, Hamilton, Ontario, Canada, L8S 4K1; <sup>4</sup>Harbor Branch Oceanographic  
12 Institute, Florida Atlantic University, Fort Pierce, FL, 34946, USA

13

14 \*corresponding author

15

16

17

18

19

20

21

22

23

24

25

26

27 **ABSTRACT**

28

29 Climate change induced salinization events are predicted to intensify and lead to increased salt  
30 stress in freshwater aquatic ecosystems. As a consequence, formerly distinct abiotic conditions  
31 and associated biotic communities merge, and the emergence, loss, and persistence of microbial  
32 taxa modify the types and rates of ecosystem processes. This study examined how bacterial  
33 taxonomic and phylogenetic diversity and ecosystem function respond to acute salinization events  
34 where freshwater and estuarine communities and environments coalesce. We hypothesize that if  
35 the salinity change outpaces microbial adaptation or saline microbial populations are not yet  
36 established in formerly freshwater conditions, then we predict diminished carbon cycling rates,  
37 decreased microbial diversity, and altered the composition of microbial communities compared to  
38 historically freshwater communities. We used an experimental mesocosm approach to determine  
39 how salinity and the merging of distinct communities influenced resultant bacterial community  
40 structure and function. Each mesocosm represented different salinities (0, 5, 9, 13 psu). Two  
41 dispersal treatments, representing aquatic communities sourced from brackish 13 psu ponds and  
42 a mix of 13 psu and freshwater ponds, were added to all salinity levels and replicated four times.  
43 Results revealed that salinity, but not dispersal, decreased bacterial taxonomic and phylogenetic  
44 diversity. Carbon mineralization rates were highest in freshwater conditions and associated with  
45 low relative abundance indicator taxa. Acute salinity changes, such as localized flooding due to  
46 storm surge, will more negatively affect freshwater aquatic communities compared to chronic  
47 exposure to salinization where the communities have had time to adapt or turnover resulting in  
48 recovered biogeochemical functions.

49

50 **IMPORTANCE STATEMENT**

51 Climate change induced salinization results in the mixing of formerly distinct environmental  
52 conditions and aquatic communities. This study examined the consequence of short-term, acute  
53 salinity stress on aquatic bacterial taxonomic and phylogenetic diversity and ecosystem function  
54 using an experimental approach. Results revealed that salinity, but not the source of aquatic  
55 communities, decreased bacterial taxonomic and phylogenetic diversity. Carbon mineralization  
56 rates, which represented ecosystem function, were highest in freshwater conditions and also  
57 associated with low relative abundance indicator bacterial taxa. Taken together, acute salinity  
58 changes will more negatively affect freshwater aquatic communities compared to chronic  
59 exposure to salinization where the communities have had time to adapt or turnover resulting in  
60 recovered biogeochemical functions.

61

62

63

64

65

66

67

68

69

70

71

72

73

74

75

## 76 INTRODUCTION

77 Predicting microbial community response to environmental change depends on the tolerance  
78 and preference of microbial taxa to current and historical environmental conditions, ongoing  
79 changes in environmental conditions, and concurrent community assembly processes (1–3).  
80 Environmental changes, such as sea level rise and punctuated salinization events, are predicted  
81 to intensify in the coming decades as land development and climate change continue (4). Sea-  
82 level rise and saltwater intrusion in previously freshwater wetlands can diminish wetland  
83 ecosystem functions by increasing toxic sulfide production, decreasing inorganic nitrogen  
84 removal, and decreasing carbon storage. In some cases, diminished microbial functions  
85 negatively affect water quality, climate regulation, wetland accretion, and the health of wetland  
86 biota (5, 6). However, it is unclear how the composition and function of microbial communities at  
87 newly established fresh-salt water interfaces will change as salinization events increase in  
88 frequency and duration, especially with regard to subsets of taxa that respond to the coalescence  
89 event (i.e., the merging of distinct microbial communities and environments) (7, 8). As aquatic  
90 ecosystems shift from fresh to brackish waters, the concentration of alternative terminal electron  
91 acceptors (i.e., Fe(III), Mn(IV)) increases, which prompts CO<sub>2</sub> production (6). As a result,  
92 environmental stressors are altering the microbial communities governing these carbon cycling  
93 rates.

94 Salinity tolerance has convergently evolved in unrelated lineages across the tree of life (9,  
95 10). Salinity preference and osmotic tolerance are considered a complex microbial trait (11). Two  
96 mechanisms are responsible for osmotic or salinity stress tolerance in microorganisms. First,  
97 microorganisms can adapt by excluding harmful solutes (e.g., sodium, chloride) while gathering  
98 beneficial solutes necessary for metabolism instead by using active transport systems (12).  
99 Second, some microorganisms can create organic compounds to reduce the concentration  
100 gradient between the external environment and the cell resulting in the net export of unwanted  
101 solutes (13–15). Some studies suggest that long-term salinity changes, like those due to sea level

102 rise, may occur slowly enough that the organisms can adapt and/or communities reassemble  
103 according to environmental changes. Long-term, incremental salinity increases have promoted  
104 microbial diversity and community establishment of salt-preference in a variety of taxa.  
105 Salinization in tidal and non-tidal systems results in different community responses. For example,  
106 tidal wetland decomposition rates increase as salinity increases due in part to marine/estuarine  
107 subsidies mixing with freshwater ecosystems (16). While experiencing short-term acute  
108 salinization, microbial populations have recovered from previously diminished carbon cycling  
109 functions (carbon dioxide and methane production) (17). Prior studies have revealed both  
110 increases in decomposition rates (15, 18) and decreases in decomposition rates (Neubauer et al.  
111 2013, 2019) as a result of increases in salinity. Punctuated salinity pulses to historically freshwater  
112 ecosystems, such as localized flooding due to storm surge in a climatic event, will more negatively  
113 affect freshwater communities compared to constant exposure to salinization. The challenge to  
114 predicting salinization effects on decomposition rates is due to interactions among the following:  
115 direct effects of redox shifts between oxic and anoxic conditions, direct effects on heterotrophic  
116 communities and local nutrient availability, and the indirect effects due to changes in organic  
117 carbon sources (21).

118 Salinity tolerance and preference are traits that constrain microbial community response to  
119 salinization (22). As freshwater salinization across inland freshwaters persists, drastic changes to  
120 microbial community structure and function will continue to increase (23). The emergence, loss,  
121 and persistence of microbial taxa can alter the types and rates of ecosystem functions. The  
122 microbial taxa that will survive punctuated salinity changes will have specialized traits. These  
123 'effect' traits can be directly linked to ecosystem functioning (11). Salinity preference is identified  
124 as one of the most complex trait measurements, classifying it based on how many genes are  
125 directly involved in coding the trait and how the trait is integrated with other mechanisms (11).  
126 Because specialized traits are needed for organisms to tolerate increasingly saline environments,  
127 major shifts in microbial composition and diversity are expected (24, 25). When freshwater and

128 marine microbes are experimentally mixed, results revealed that taxa which were rare at the initial  
129 inoculation became relatively abundant (8). As the community shifts, organisms that are better  
130 adapted to new conditions may become more active and abundant, which can alter the dominant  
131 ecosystem processes (1, 3).

132 In this study, we address the research question: how does acute salinization affect microbial  
133 taxonomic and phylogenetic diversity and function when freshwater microbial communities mix  
134 with estuarine aquatic communities along freshwater to saltwater gradient? Specialized microbial  
135 traits are necessary to tolerate or thrive in saline environments. We hypothesize that if salinity  
136 change outpaces microbial adaptation or saline microbial populations are not yet established in  
137 formerly freshwater conditions, then we predict diminished carbon cycling rates (i.e., CO<sub>2</sub>  
138 respiration) and decreased microbial diversity and altered the composition of microbial  
139 communities when compared to historically freshwater microbial communities. We also expect  
140 that microorganisms that persist in more saline conditions will be more phylogenetically related to  
141 each other (i.e., less genetic variation) compared to historically freshwater microorganisms.  
142 Understanding how salinization alters freshwater wetland bacterial phylogenetic-ecosystem  
143 function relationships can inform the management of carbon storage capacity in coastal wetlands  
144 experiencing increased salinization.

145

## 146 **MATERIALS AND METHODS**

147 **Experimental Design.** Microbial community composition and function were characterized based  
148 on aquatic samples that were collected from a replicated mesocosm experiment conducted from  
149 June-July 2015 (Figure 1) (26). To replicate a freshwater-saltwater aquatic system, peat moss (to  
150 serve as a nutrient pulse), sand (to serve as a benthic substrate), and water were added to 150-  
151 gallon stock watering tanks (filled to 100 gallons). Each mesocosm pond was adjusted to one of  
152 4 different salinities (measured in practical salinity units) using Instant Ocean® Sea Salt (4 levels:  
153 0, 5, 9, 13 psu). Each tank was then seeded with an inoculation consisting of water, zooplankton

154 and microbes collected from natural ponds in the outer banks of North Carolina (see  
155 **Supplemental Table S1** for coastal pond location and information). Twenty 1 L water samples  
156 were collected and filtered through 62.5  $\mu\text{m}$  mesh across a one-hundred meter transect at each  
157 of the 5 coastal ponds and subsequently dispersed into each mesocosm tank. Bacterial  
158 communities represented in the source communities were likely particle- and zooplankton-  
159 associated. Each tank was covered with a shade cloth to reduce the opportunity for other  
160 organisms from colonizing the mesocosms. Populations introduced via the initial inoculation were  
161 allowed to stabilize for 6 weeks before sampling began. After this acclimation period, mesocosms  
162 received additional colonists of zooplankton and microbes via simulated dispersal events from  
163 separate mesocosm ponds established as source tanks for salt (13 psu) and freshwater (0 psu)  
164 zooplankton and microbial communities. The two source tanks served as dispersal treatments,  
165 and consisted of either a saltwater (13 psu; salt dispersal treatment) community or a mix of  
166 communities from freshwater (0 psu) and saltwater (13 psu; fresh+salt dispersal treatment).  
167 Dispersal treatments consisted of 2 L of water from dispersal (source) tanks into the experiment  
168 (treatment) tanks. Sample collection occurred every 9 days (due to average time for completion  
169 of one zooplankton generation cycle) (27) over the 6-week mesocosm experiment for a total of  
170 six time points. The salinity  $\times$  dispersal setup was replicated 4 times to generate 16 tanks (4 at  
171 each salinity level) with the salt dispersal treatment or with the fresh+salt dispersal treatment (26).  
172 For each tank, the following were measured using a YSI Pro: dissolved oxygen, ammonium  
173 ( $\text{NH}_4^+$ ), temperature, and pH. Community analysis was focused on three of the time points (days  
174 0, 18, and 45; 11 June 2015, 29 June 2015, and 25 July 2015, respectively), representing the  
175 initial, middle, and end of the experiment. Besides salinity levels, measured nitrogen and  
176 phosphorus concentrations were similar among treatment tanks (26).

177

178 **Microbial Sample Collection and Processing.** Sample collection occurred every 9 days over  
179 the time of the 6-week mesocosm experiment for a total of six time points. During each sampling

180 event, we collected 1 L of water from each tank. Each 1 L bottle of mesocosm water was  
181 homogenized and 200 mL of the water sample were concentrated onto 0.22  $\mu\text{m}$  filters within 24  
182 hours of field sampling (Supor-200; Pall Gelman, East Hills, NY) to collect microbial community  
183 samples. Filters were transferred into 2 mL sterile tubes and stored at  $-80^{\circ}\text{C}$  until molecular  
184 analyses. We extracted DNA from filters collected at three (of the six) time points representing  
185 the initial, middle, final sampling dates (Days 0, 18, 45) using the PowerWater DNA Isolation Kit  
186 (MO BIO Laboratories).

187

188 **Microbial Community Sequencing.** To examine shifts in microbial community composition and  
189 diversity, aquatic microbial communities in each mesocosm were characterized using paired-end  
190 targeted Illumina sequencing of the 16S rRNA gene (bacteria, archaea) (28). We extracted and  
191 purified the DNA found in the water of each mesocosm using the PowerWater DNA Isolation Kit  
192 (MO BIO Laboratories, Inc., Carlsbad, CA) using the sample collected a 0.22  $\mu\text{m}$  supor filter post-  
193 filtration. We used this DNA as a template in PCR reactions. To characterize bacterial  
194 communities, we used barcoded primers (515FB/806RB) originally developed by the Earth  
195 Microbiome Project (28) to target the V4-V5 region of the bacterial 16S subunit of the ribosomal  
196 RNA gene (29, 30). PCR products were combined in equimolar concentrations and sequenced  
197 using paired-end (2x250 bp) approach using the Illumina MiSeq platform at Indiana University's  
198 Center for Genomics and Bioinformatics.

199 Raw bacterial sequences were processed using the Mothur pipeline (version 1.41.3) (31).  
200 Briefly, paired-end contigs were assembled and quality trimmed, sequences were then aligned to  
201 the Silva Database (version 132) (32) chimeric sequences were removed using the VSEARCH  
202 algorithm (33), and we removed any sequences classified as Chloroplasts, Mitochondria,  
203 Archaea, or Eukaryotes. Next, we identified operational taxonomic units (OTUs) by separating  
204 sequences based on taxonomic class and then binning sequences using a 97% sequence  
205 similarity cutoff. Representative sequences from each OTU were used to generate a phylogenetic



206 tree using FastTree v2.1 using the GTR model and CAT rate approximation (Price et al. 2010).

207 See Supplemental Material for full sequence processing pipeline.

208

209 **Compositional Analyses.** We used a combination of taxonomic and phylogenetic approaches  
210 to characterize the diversity of bacterial communities in each mesocosm. First, we calculated  
211 alpha diversity (within-sample) using either Shannon's diversity (taxonomic) or Faith's Diversity  
212 (phylogenetic). The Faith's Phylogenetic Diversity (PD) metric provides a simple measure of the  
213 phylogenetic relatedness of a community based on the summed branch lengths of its phylogenetic  
214 tree. We expected this measure to capture functional complementarity if more distantly related  
215 species are more functionally unique. We rarefied the OTU table to 20,000 observations before  
216 calculating alpha-diversity. Next, we calculated beta-diversity (among sites) by calculating Bray-  
217 Curtis distance for taxonomic diversity and weighted UniFrac distance for phylogenetic diversity.  
218 Differences in beta-diversity were visualized using Principal Coordinates Analysis.

219

220 **Carbon Mineralization Assay.** On the final mesocosm sampling date, day 45, we measured the  
221 amount of CO<sub>2</sub> respired from the aquatic communities using a laboratory-based bottle assay.  
222 Wheaton bottles (125 mL) fitted with septa were filled with water samples (25 mL) from each  
223 mesocosm tank. The CO<sub>2</sub> concentration readings were determined using an LI-7000 Infrared Gas  
224 Analyzer (IRGA). On the first day (Day 0), bottles were filled with 25 mL of mesocosm tank water,  
225 and the gas samples were collected and analyzed immediately using the IRGA to determine the  
226 baseline CO<sub>2</sub> concentration. A syringe was inserted into the septa and the headspace gas was  
227 mixed 3 times before pulling a sample and beginning analysis using the IRGA. This process was  
228 repeated on days one, three, and seven in order to determine CO<sub>2</sub> respiration rates over time.

229

230 **Statistical Analyses.** We completed statistical calculations in the R environment (R v3.6.3, R  
231 Core Development Team 2020). For bacterial diversity metrics, we conducted a linear mixed

232 effects model with 'date', 'salinity', and 'dispersal' as fixed effects and 'block' as a random effect  
233 using the *lmer()* function in the lmerTest package (Kuznetsova et al. 2017) and the pbkrtest  
234 package (Halekoh and Højsgaard 2014). We ran linear mixed models that were fit by REML and  
235 produced type II analysis of variances tables (ANOVA) tables based on the Kenward-Roger's  
236 denominator degrees of freedom method using the *anova()* function. Then, we used principal  
237 coordinates analysis (PCoA) based on the Bray-Curtis dissimilarity of bacterial community  
238 composition and based on the weighted Unifrac distance of phylogenetic diversity along the  
239 salinity gradient. We ran a permutational multivariate analysis of variance (PERMANOVA) to  
240 examine among-treatment differences in bacterial communities. We identified which bacterial  
241 species were most representative of each salinity treatment using an indicator species analysis  
242 based on salinity level and also a categorical saline vs non-saline classification, and we included  
243 bacterial taxa with a relative abundance greater than 0.05 when summed across all plots. We  
244 performed PERMANOVA using the *adonis()* function in the vegan package (Oksanen et al. 2017)  
245 and the *indval()* function in the indicpecies package (Caceres and Jansen 2016). We visualized  
246 overlap in indicator taxa across the salinity gradient using an Euler plot. To better understand the  
247 phylogenetic underpinnings of saline tolerant and sensitive taxa, we visualized the indicators on  
248 a phylogenetic tree and used the ConcenTrait algorithm to determine the phylogenetic depth at  
249 which saline tolerance/sensitivity is conserved (34). Briefly, this algorithm finds the nodes in the  
250 phylogeny at which 90% of the included tips (taxa) share the same trait. We implemented the  
251 ConcenTrait algorithm using a custom R script.

252

### 253 **Data Availability**

254 All code and data used in this study are located in a public GitHub repository  
255 ([https://github.com/PeraltaLab/CSI\\_Dispersal](https://github.com/PeraltaLab/CSI_Dispersal)) and NCBI SRA [BioProject ID PRJNA615001](#).

256

257

## 258 RESULTS

259 We examined bacterial community turnover throughout the mesocosm experiment by  
260 comparing patterns in bacterial phylogenetic and taxonomic composition across the salinity  
261 gradient. Throughout the experiment, freshwater communities were phylogenetically distinct  
262 compared to saline communities based on weighted UniFrac distance metric (Fig. 2A, Table S2,  
263 PERMANOVA salinity:  $R^2=0.172$ ,  $P<0.001$ ). Bacterial communities were phylogenetically similar  
264 during day 18, but after 45 days at the experimental salinity level, communities at 9 and 13 psu  
265 were distinct from communities at 5 psu (Fig. 1A, Table S2, PERMANOVA salinity x date:  
266  $R^2=0.048$ ,  $P<0.001$ ). When bacterial taxonomic composition was compared, salinity was a much  
267 stronger environmental filter associated with bacterial community patterns (Werba et al. 2020)  
268 (Fig. 2B).

269 Next, we compared patterns in bacterial phylogenetic diversity to taxonomic composition  
270 across the salinity gradient. Communities observed in the freshwater conditions increased in  
271 mean PD over the 45 day experiment. The PD of communities at the transition 9 psu tanks  
272 declined throughout the experiment duration, while PD of communities in the 13 psu tanks  
273 increased in variability from day 0 to 45 (Fig. 2C, Table S3, ANOVA,  $F_{2,79}=5.997$ ,  $P=0.004$ ). After  
274 45 days, PD was highest in freshwater and lowest in brackish tanks (Fig. 2C).

275 There are OTUs represented across major phyla that are associated with all salinity levels  
276 (Fig. 3A). A striking observation was the smallest number of OTUs represented at 9 psu compared  
277 to other treatments, which is represented in the unrooted tree (Fig. 3A). Next, we used a series  
278 of Euler plots to reveal shared and unique indicator OTUs. A list of “indicators” that were  
279 significantly associated with each salinity treatment is found in Table S3. These indicators,  
280 reported at the class-level, are the taxonomic groups best associated with each treatment. Based  
281 on OTUs identified as indicator taxa, 254 OTUs are unique to the freshwater treatment, 135 OTUs  
282 are unique to the 5 psu treatment, 35 OTUs were unique to the 9 psu treatment, and 124 OTUs  
283 are unique to the 13 psu treatment (Fig. 3B). When the OTUs were grouped into salt or no salt,

284 there are 206 observed indicator OTUs shared across 5, 9, or 13 psu environments, and 257  
285 OTUs unique to the 0 psu treatment (Fig. 3B). Finally, when examining the depth of phylogenetic  
286 relatedness, results from the ConcenTrait analysis revealed that saline vs non-saline microbes  
287 exhibit a similar depth in average phylogenetic relatedness (Fig. 3C).

288 We examined the relationship between carbon mineralization and phylogenetic diversity and  
289 relative abundance. Dispersal treatment did not affect the relationship between carbon  
290 mineralization rates and taxonomic or phylogenetic diversity (Fig. 4A). At the transition 9 psu  
291 treatments, we measured the lowest measured function compared to other salinity treatments.  
292 Carbon mineralization rates were highest in freshwater conditions and associated relatively low  
293 abundance indicator taxa (Fig. 4B). In contrast, the relative abundance of indicator taxa  
294 represented in the saltwater conditions represented > 25% of the community.

295

## 296 **DISCUSSION**

297 This study specifically focused on determining the extent that short-term salinization events  
298 influenced reassembly patterns of aquatic communities and consequent cycling function. Results  
299 revealed that salinity strongly influenced bacterial phylogenetic diversity; bacterial communities  
300 tended to respond to salinity, rather than dispersal, because it is such a strong environmental filter  
301 (8, 10). Past research has shown that strong environmental filters produce phylogenetically  
302 clustered communities (11, 35–37). However, the mixing of two formerly distinct communities and  
303 their environments could affect community structure and function in unpredictable ways.  
304 Outcomes depend on the strength of the environmental change and the capacity for taxa to  
305 successfully establish and reproduce after mixing events occur (2, 3). There are many factors that  
306 determine how bacterial community composition will change in response to an influx of saline-  
307 dominant communities following a salinization event. Both stochastic processes (such as drift)  
308 and deterministic processes (such as the interaction of biotic and abiotic factors) within an  
309 ecosystem can determine patterns of community assembly via four processes: selection,

310 dispersal, diversification, and drift (35, 38). Abiotic factors in an environment often act as  
311 environmental filters, selecting for organisms that are adapted to establish and persist. In this  
312 study, when fresh and saline communities collided, the environmental conditions strongly dictated  
313 the newly established community assemblages based on taxonomy but not phylogeny.

314 Bacterial taxa were more related to each other in transition salinity environments (5 and 9  
315 psu) compared to fresh and the most saline endpoint environments. In the case of our study, we  
316 added a mixture of freshwater and mesohaline (13 psu) aquatic communities in equal proportion  
317 as dispersal treatments along an experimental salinity gradient. The dispersal treatments  
318 represented natural dispersal methods of aquatic communities via water; a fresh community being  
319 mixed with a saline community can occur in storm events with coastal flooding, as well as gradual  
320 mixing of these environments via sea level rise. These methods of dispersal are on different time-  
321 scales, but each is potentially important to community assembly at mixing zones. Because  
322 dispersal of microbes is often a passive process, we recognize that the longest transport of  
323 microbial species is via wind, water, and attachment to mobile organisms (Nemergut et al. 2013).

324 Overall, bacterial communities tended to respond to salinity, rather than dispersal, because it  
325 is such a strong environmental filter and because salinity tolerance is a relatively deeply  
326 conserved trait (10, 11, 39). The depth of phylogenetic relatedness was similar for saline and non-  
327 saline communities. This suggests that there is a deep fresh-salt divide as previously revealed (7,  
328 8, 10). Past studies show that selection may act on traits that are subject to HGT, which can alter  
329 processes by transferring genetic material (i.e., a trait that would allow a previously rare organism  
330 to establish and persist in a previously inhospitable environment) (40, 41). These organisms can  
331 now explore new fitness landscapes and diversify (35). However, gaining a trait is not always a  
332 simple process, as some traits are complex and cannot be easily inherited (10, 11, 39). Ecological  
333 drift (constant changes in relative abundance of organisms) may also potentially affect community  
334 assembly. In particular, low abundance organisms (i.e., majority of microbial species) are more  
335 vulnerable to drift (35). Alternatively, rare taxa that were not detectable based on amplicon

336 sequencing methods were identified as responding positively to mixing events, making the role of  
337 rare taxa important for driving community composition changes (7, 8).

338 It is also important to consider the intensity and length of the disturbance affecting a microbial  
339 community (42). The disturbance in this experiment was the addition of salinity and saline-  
340 adapted aquatic species to historically freshwater communities. This disturbance was intended to  
341 represent salinization due to acute salinization events such as storm surge. At the end of the  
342 experiment, phylogenetic diversity (PD) was low for both dispersal treatments at the highest  
343 salinity, indicating that the bacteria persisting in those tanks were more related to each other  
344 (lower PD). This observation supported the hypothesis that PD would be lowest in the most saline  
345 tank, due to salinity tolerance being a complex trait.

346 After saline and freshwater communities mixed, we observed the highest carbon  
347 mineralization rates in freshwater environments and associated disproportionately lower  
348 abundance taxa. In contrast, microbes carried out lower carbon mineralization rates under saline  
349 conditions, which were associated with indicator taxa at >25% relative abundance. Salinization  
350 influences microbes through osmotic stress and ion-specific toxicity, but salinization can also  
351 provide terminal electron acceptors to drive and change the rates and types of microbial  
352 metabolisms. Some studies suggest that long-term salinity changes, like those due to sea level  
353 rise, may occur slowly enough that the organisms can adapt (e.g., Mansour et al. 2018). Acute  
354 salinity changes caused by “pulses” of salinity influx, such as localized flooding due to storm  
355 surge, will more negatively affect freshwater aquatic communities compared to chronic exposure  
356 to salinization where the communities have had time to adapt or turnover resulting in recovered  
357 biogeochemical functions (e.g., Mansour et al. 2018). Thus, unexpected pulses of salinity are  
358 observed (in some cases) to cause greater damage to ecosystem structure and function than  
359 long-term salinity changes due to the inability of organisms to adapt or change quickly following  
360 one of these events (6, 17, 43).

361 Global climate change plays a large role in facilitating increased dispersal of microbes; the  
362 predicted increases in extreme weather events may potentially promote increased spread of  
363 microbes to new, adaptable environments (44, 45). As previously discussed, microbes have  
364 several mechanisms for adapting to environmental change; this experiment did not address which  
365 mechanisms were used. Future studies focused on bacterial community structure and function  
366 under increasing salinity would benefit from examining mechanisms of adaptation that taxa may  
367 use when placed under environmental stress.

368

### 369 **Acknowledgments**

370 We thank Spencer Wilkinson, Amanda Dunn, and Mary-Grace Lee for help with data collection.  
371 We also thank Mike Piehler and Corey Adams for logistical help at the Coastal Studies Institute.  
372 This work was supported in part by the East Carolina University Division of Research, Economic  
373 Development, and Engagement and the Department of Biology.

374

### 375 **References**

- 376 1. Feckler A, Goedkoop W, Konschak M, Bundschuh R, Kenngott KGJ, Schulz R, Zubrod JP,  
377 Bundschuh M. 2018. History matters: heterotrophic microbial community structure and  
378 function adapt to multiple stressors. *Glob Change Biol* 24:e402–e415.
- 379 2. Mansour I, Heppell CM, Ryo M, Rillig MC. 2018. Application of the microbial community  
380 coalescence concept to riverine networks. *Biol Rev* 93:1832–1845.
- 381 3. Castledine M, Sierocinski P, Padfield D, Buckling A. 2020. Community coalescence: an  
382 eco-evolutionary perspective. *Philos Trans R Soc B Biol Sci* 375:20190252.
- 383 4. He Q, Silliman BR. 2019. Climate Change, Human Impacts, and Coastal Ecosystems in  
384 the Anthropocene. *Curr Biol* 29:R1021–R1035.
- 385 5. Kirwan ML, Megonigal JP. 2013. Tidal wetland stability in the face of human impacts and  
386 sea-level rise. *Nature* 504:53–60.

- 387 6. Herbert ER, Boon P, Burgin AJ, Neubauer SC, Franklin RB, Ardón M, Hopfensperger KN,  
388 Lamers LPM, Gell P. 2015. A Global Perspective on Wetland Salinization: Ecological  
389 Consequences of a Growing Threat to Freshwater Wetlands. *Ecosphere* 6:1–43.
- 390 7. Shen D, Langenheder S, Jürgens K. 2018. Dispersal Modifies the Diversity and  
391 Composition of Active Bacterial Communities in Response to a Salinity Disturbance. *Front*  
392 *Microbiol* 9.
- 393 8. Rocca JD, Simonin M, Bernhardt ES, Washburne AD, Wright JP. 2020. Rare microbial  
394 taxa emerge when communities collide: freshwater and marine microbiome responses to  
395 experimental mixing. *Ecology* 101:e02956.
- 396 9. Logares R, Lindström ES, Langenheder S, Logue JB, Paterson H, Laybourn-Parry J,  
397 Rengefors K, Tranvik L, Bertilsson S. 2013. Biogeography of bacterial communities  
398 exposed to progressive long-term environmental change. *5. ISME J* 7:937–948.
- 399 10. Paver SF, Muratore D, Newton RJ, Coleman ML. 2018. Reevaluating the Salty Divide:  
400 Phylogenetic Specificity of Transitions between Marine and Freshwater Systems.  
401 *mSystems* 3.
- 402 11. Martiny JBH, Jones SE, Lennon JT, Martiny AC. 2015. Microbiomes in light of traits: A  
403 phylogenetic perspective. *Science* 350:aac9323.
- 404 12. Oren A. 1999. Bioenergetic Aspects of Halophilism. *Microbiol Mol Biol Rev* 63:334–348.
- 405 13. Galinski EA, Trüper HG. 1994. Microbial behaviour in salt-stressed ecosystems. *FEMS*  
406 *Microbiol Rev* 15:95–108.
- 407 14. Kempf B, Bremer E. 1998. Uptake and synthesis of compatible solutes as microbial stress  
408 responses to high-osmolality environments. *Arch Microbiol* 170:319–330.
- 409 15. Weston NB, Vile MA, Neubauer SC, Velinsky DJ. 2011. Accelerated microbial organic  
410 matter mineralization following salt-water intrusion into tidal freshwater marsh soils.  
411 *Biogeochemistry* 102:135–151.
- 412 16. Morrissey EM, Gillespie JL, Morina JC, Franklin RB. 2014. Salinity affects microbial activity



- 413 and soil organic matter content in tidal wetlands. *Glob Change Biol* 20:1351–1362.
- 414 17. Chambers LG, Osborne TZ, Reddy KR. 2013. Effect of salinity-altering pulsing events on  
415 soil organic carbon loss along an intertidal wetland gradient: a laboratory experiment.  
416 *Biogeochemistry* 115:363–383.
- 417 18. Marton JM, Herbert ER, Craft CB. 2012. Effects of Salinity on Denitrification and  
418 Greenhouse Gas Production from Laboratory-incubated Tidal Forest Soils. *Wetlands*  
419 32:347–357.
- 420 19. Neubauer SC, Franklin RB, Berrier DJ. 2013. Saltwater intrusion into tidal freshwater  
421 marshes alters the biogeochemical processing of organic carbon. *Biogeosciences*  
422 10:8171–8183.
- 423 20. Neubauer SC, Piehler MF, Smyth AR, Franklin RB. 2019. Saltwater Intrusion Modifies  
424 Microbial Community Structure and Decreases Denitrification in Tidal Freshwater Marshes.  
425 *Ecosystems* 22:912–928.
- 426 21. Stagg CL, Schoolmaster DR, Krauss KW, Cormier N, Conner WH. 2017. Causal  
427 mechanisms of soil organic matter decomposition: deconstructing salinity and flooding  
428 impacts in coastal wetlands. *Ecology* 98:2003–2018.
- 429 22. Dupont CL, Larsson J, Yooseph S, Ininbergs K, Goll J, Asplund-Samuelsson J, McCrow  
430 JP, Celepli N, Allen LZ, Ekman M, Lucas AJ, Hagström Å, Thiagarajan M, Brindefalk B,  
431 Richter AR, Andersson AF, Tenney A, Lundin D, Tovchigrechko A, Nylander JAA, Bрами D,  
432 Badger JH, Allen AE, Rusch DB, Hoffman J, Norrby E, Friedman R, Pinhassi J, Venter JC,  
433 Bergman B. 2014. Functional Tradeoffs Underpin Salinity-Driven Divergence in Microbial  
434 Community Composition. *PLOS ONE* 9:e89549.
- 435 23. Kaushal SS, Likens GE, Pace ML, Utz RM, Haq S, Gorman J, Grese M. 2018. Freshwater  
436 salinization syndrome on a continental scale. *Proc Natl Acad Sci* 115:E574–E583.
- 437 24. Rath KM, Rousk J. 2015. Salt effects on the soil microbial decomposer community and  
438 their role in organic carbon cycling: A review. *Soil Biol Biochem* 81:108–123.

- 439 25. Trivedi P, Delgado-Baquerizo M, Trivedi C, Hu H, Anderson IC, Jeffries TC, Zhou J, Singh  
440 BK. 2016. Microbial regulation of the soil carbon cycle: evidence from gene–enzyme  
441 relationships. *ISME J* 10:2593–2604.
- 442 26. Werba JA, Stucy AL, Peralta AL, McCoy MW. 2020. Effects of diversity and coalescence of  
443 species assemblages on ecosystem function at the margins of an environmental shift.  
444 *PeerJ* 8:e8608.
- 445 27. Thompson PL, Shurin JB. 2012. Regional zooplankton biodiversity provides limited  
446 buffering of pond ecosystems against climate change. *J Anim Ecol* 81:251–259.
- 447 28. Caporaso JG, Lauber CL, Walters WA, Berg-Lyons D, Huntley J, Fierer N, Owens SM,  
448 Betley J, Fraser L, Bauer M, Gormley N, Gilbert JA, Smith G, Knight R. 2012. Ultra-high-  
449 throughput microbial community analysis on the Illumina HiSeq and MiSeq platforms.  
450 *ISME J* 6:1621–1624.
- 451 29. Apprill A, McNally S, Parsons R, Weber L. 2015. Minor revision to V4 region SSU rRNA  
452 806R gene primer greatly increases detection of SAR11 bacterioplankton. *Aquat Microb  
453 Ecol* 75:129–137.
- 454 30. Parada AE, Needham DM, Fuhrman JA. 2016. Every base matters: assessing small  
455 subunit rRNA primers for marine microbiomes with mock communities, time series and  
456 global field samples. *Environ Microbiol* 18:1403–1414.
- 457 31. Kozich JJ, Westcott SL, Baxter NT, Highlander SK, Schloss PD. 2013. Development of a  
458 dual-index sequencing strategy and curation pipeline for analyzing amplicon sequence  
459 data on the MiSeq Illumina sequencing platform. *Appl Environ Microbiol* 79:5112–20.
- 460 32. Yilmaz P, Parfrey LW, Yarza P, Gerken J, Priesse E, Quast C, Schweer T, Peplies J,  
461 Ludwig W, Glöckner FO. 2014. The SILVA and “All-species Living Tree Project (LTP)”  
462 taxonomic frameworks. *Nucleic Acids Res* 42:D643–D648.
- 463 33. Rognes T, Flouri T, Nichols B, Quince C, Mahé F. 2016. VSEARCH: a versatile open  
464 source tool for metagenomics. *PeerJ* 4:e2584.

- 465 34. Martiny AC, Treseder K, Pusch G. 2013. Phylogenetic conservatism of functional traits in  
466 microorganisms. *ISME J* 7:830.
- 467 35. Nemergut DR, Schmidt SK, Fukami T, O'Neill SP, Bilinski TM, Stanish LF, Knelman JE,  
468 Darcy JL, Lynch RC, Wickey P, Ferrenberg S. 2013. Patterns and Processes of Microbial  
469 Community Assembly. *Microbiol Mol Biol Rev* 77:342–356.
- 470 36. Graham EB, Crump AR, Resch CT, Fansler S, Arntzen E, Kennedy DW, Fredrickson JK,  
471 Stegen JC. 2016. Coupling Spatiotemporal Community Assembly Processes to Changes  
472 in Microbial Metabolism. *Front Microbiol* 7.
- 473 37. Reese AT, Lulow K, David LA, Wright JP. 2018. Plant community and soil conditions  
474 individually affect soil microbial community assembly in experimental mesocosms. *Ecol*  
475 *Evol* 8:1196–1205.
- 476 38. Vellend M. 2010. Conceptual Synthesis in Community Ecology. *Q Rev Biol* 85:183–206.
- 477 39. Logares R, Bråte J, Bertilsson S, Clasen JL, Shalchian-Tabrizi K, Rengefors K. 2009.  
478 Infrequent marine–freshwater transitions in the microbial world. *Trends Microbiol* 17:414–  
479 422.
- 480 40. Soucy SM, Huang J, Gogarten JP. 2015. Horizontal gene transfer: building the web of life.  
481 *Nat Rev Genet* 16:472–482.
- 482 41. Hall JPJ, Brockhurst MA, Harrison E. 2017. Sampling the mobile gene pool: innovation via  
483 horizontal gene transfer in bacteria. *Philos Trans R Soc B Biol Sci* 372:20160424.
- 484 42. Graham EB, Averill C, Bond-Lamberty B, Knelman JE, Krause S, Peralta AL, Shade A,  
485 Smith AP, Cheng SJ, Fanin N, Freund C, Garcia PE, Gibbons SM, Van Goethem MW,  
486 Guebila MB, Kempainen J, Nowicki RJ, Pausas JG, Reed SP, Rocca J, Sengupta A, Sihi  
487 D, Simonin M, Słowiński M, Spawn SA, Sutherland I, Tonkin JD, Wisnoski NI, Zipper SC,  
488 Consortium C, Staal A, Arora B, Oldfield C, Dwivedi D, Larson E, Santillan E, Aaron Hogan  
489 J, Atkins J, Zheng J, Lembrechts J, Patel K, Copes-Gerbitz K, Winker K, Mudge L, Wong  
490 M, Nuñez M, Luoto M, Barnes R. 2021. Toward a Generalizable Framework of Disturbance

- 491 Ecology Through Crowdsourced Science. *Front Ecol Evol* 9.
- 492 43. Wilson BJ, Servais S, Mazzei V, Kominoski JS, Hu M, Davis SE, Gaiser E, Sklar F,  
493 Bauman L, Kelly S, Madden C, Richards J, Rudnick D, Stachelek J, Troxler TG. 2018.  
494 Salinity pulses interact with seasonal dry-down to increase ecosystem carbon loss in  
495 marshes of the Florida Everglades. *Ecol Appl* 28:2092–2108.
- 496 44. Litchman E. 2010. Invisible invaders: non-pathogenic invasive microbes in aquatic and  
497 terrestrial ecosystems. *Ecol Lett* 13:1560–1572.
- 498 45. Hutchins DA, Fu F. 2017. Microorganisms and ocean global change. *Nat Microbiol* 2:1–11.

499

500

501

502

503

504

505

506

507

508

509

510

511

512

513

514

515

516

517 **FIGURES**

518 **Figure 1.** Schematic of experimental mesocosm to test the effect of salinity and dispersal of  
 519 estuarine communities into freshwater coastal ponds (A) and bacterial sequence processing for  
 520 statistical analyses (B).

521 (A) Experimental design

**EXPERIMENTAL DESIGN**

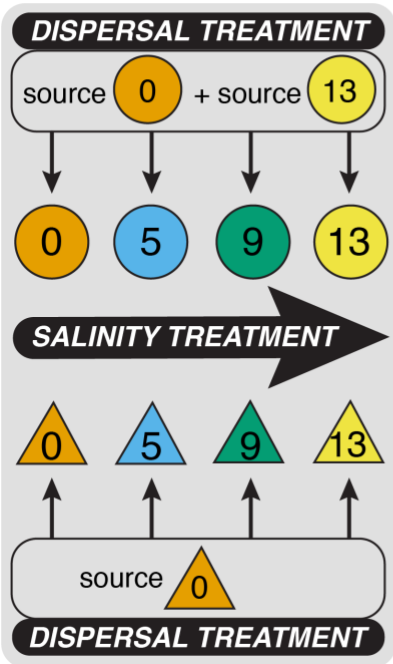

x 4 replicate mesocosm tanks

**SAMPLE PROCESSING**

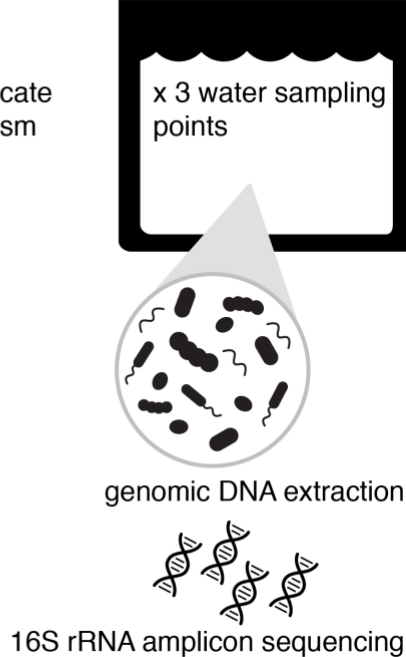

522 (B) Statistical analyses

523

524

*Processing of bacterial sequences*

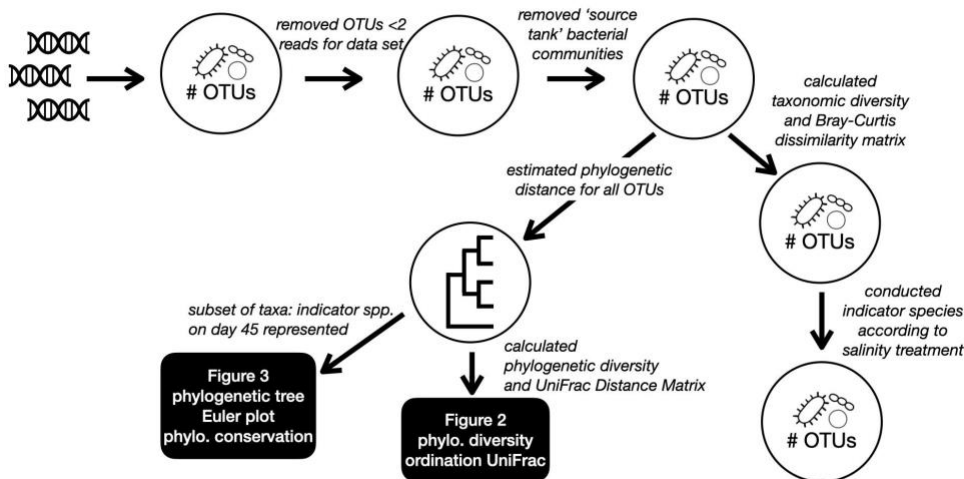

525

526 **Figure 2.** Bacterial phylogenetic and taxonomic patterns along a salinity gradient. Ordination  
527 based on a Principal Coordinates Analysis depicting bacterial phylogenetic distance (A) and  
528 Bray-Curtis dissimilarity distance (modified from Werba et al. 2020) (B), where symbols are  
529 colored according to salinity treatment (0, 5, 9, or 13 psu) and symbol shapes represent date of  
530 sampling (Day 0, 18, 45). Raincloud plots of phylogenetic diversity along a salinity gradient,  
531 where plots represent raw data depicted as filled circles ('rain'), probability distributions  
532 ('clouds'), and boxplots displaying mean and 95% confidence intervals (C). Colors represent  
533 salinity treatment (orange=0 psu, blue=5 psu, green=9 psu, yellow=13 psu), and shapes  
534 represent date of sampling (square=Day 0, circle=18, triangle=45).  
535

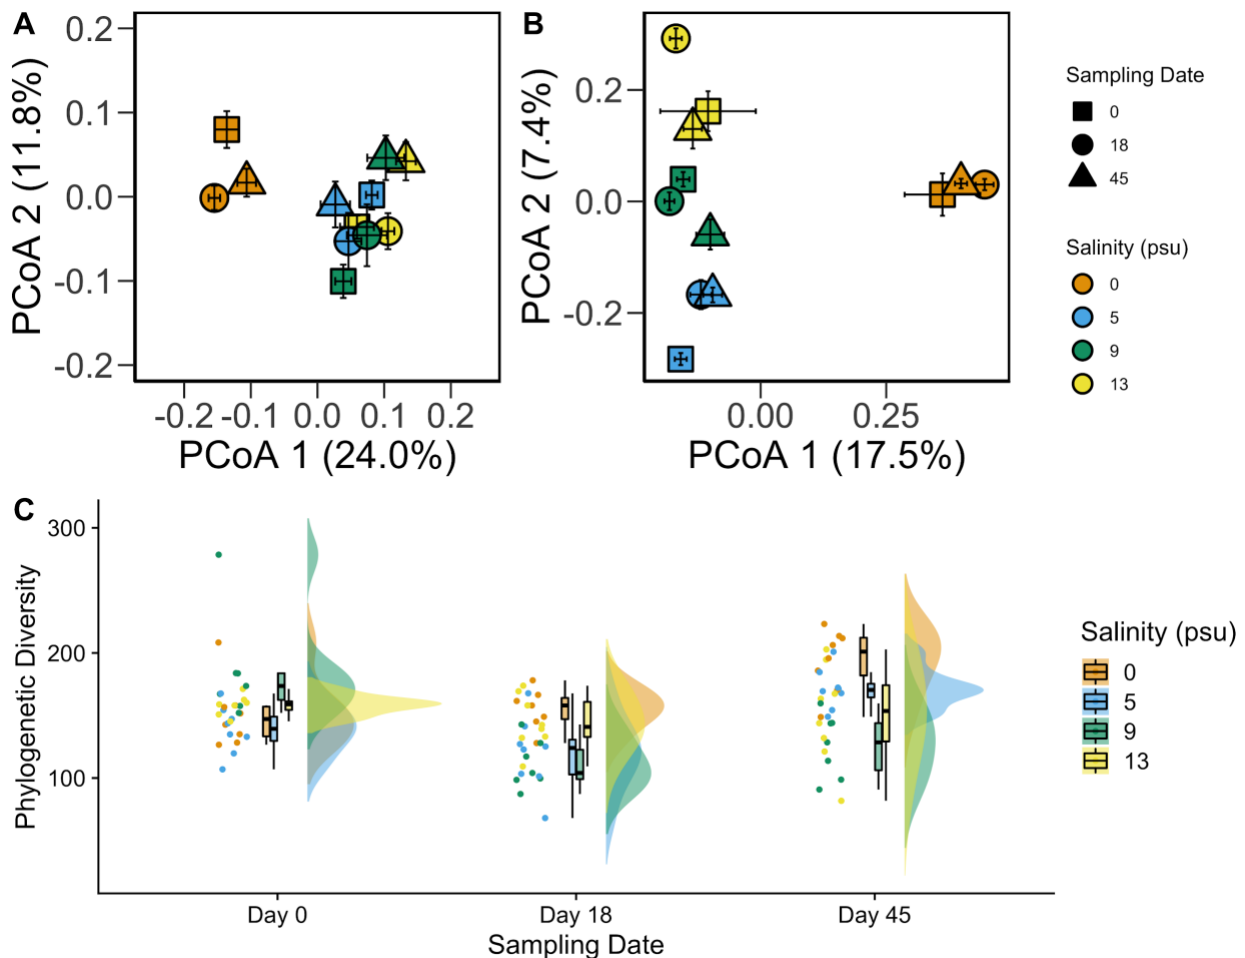

536

537 **Figure 3.** Phylogenetic patterns of indicator bacterial taxa. Phylogenetic tree of bacterial taxa that  
538 were identified to be statistically associated with salinity treatment (0, 5, 9, 13 or >13 psu); each  
539 taxon tip color corresponds to phyla level grouping and is associated with a heat map which  
540 represents OTU relative abundance salinity treatment (A). Euler plots represent bacterial OTU  
541 that are unique or shared across salinity treatments (B). Average cluster depth estimated using  
542 ConcenTrait used to depict phylogenetic distance of bacterial assemblages observed across the  
543 salinity gradient (C).  
544 **(3A)**

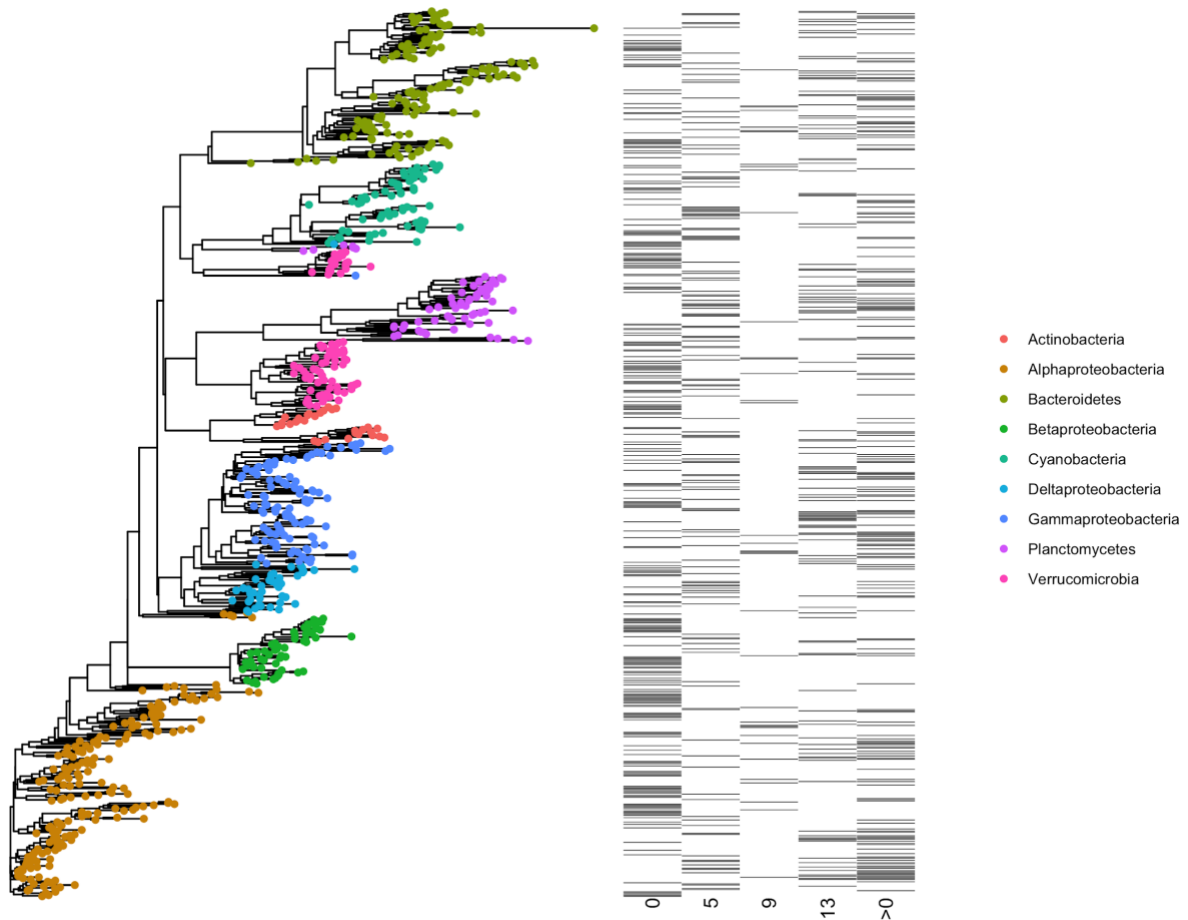

545

546

547

548 (3B)

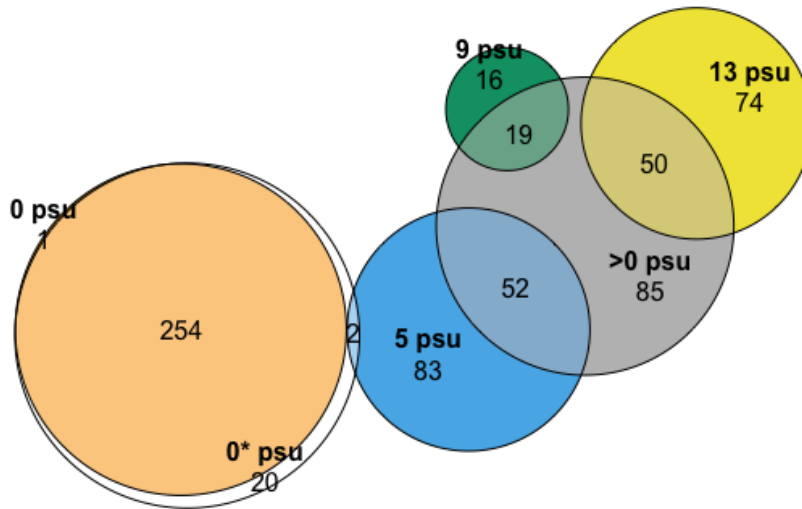

549

550 (3C)

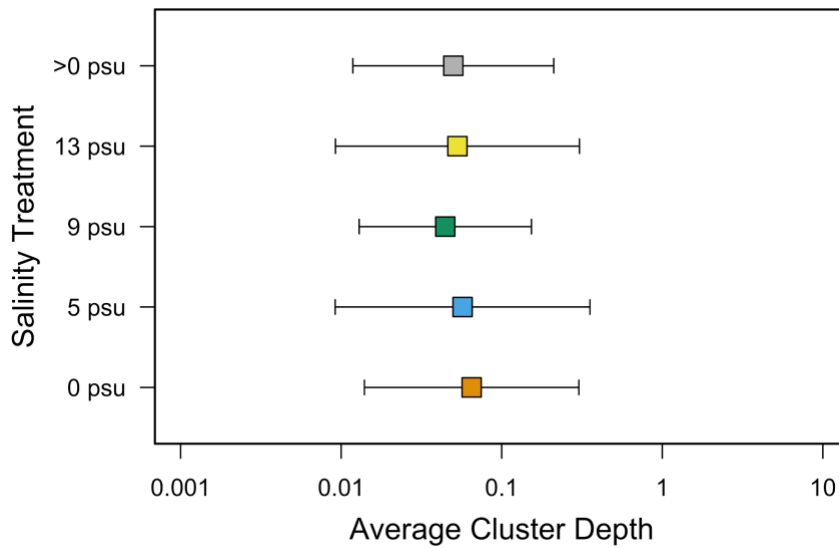

551

552

553



554 **Figure 4.** Relationship between carbon mineralization and bacterial phylogenetic diversity (PD),  
555 and taxonomic-based community metrics (relative abundance, OTU richness, and Shannon  
556 diversity) for Day 45 (last day of experiment).

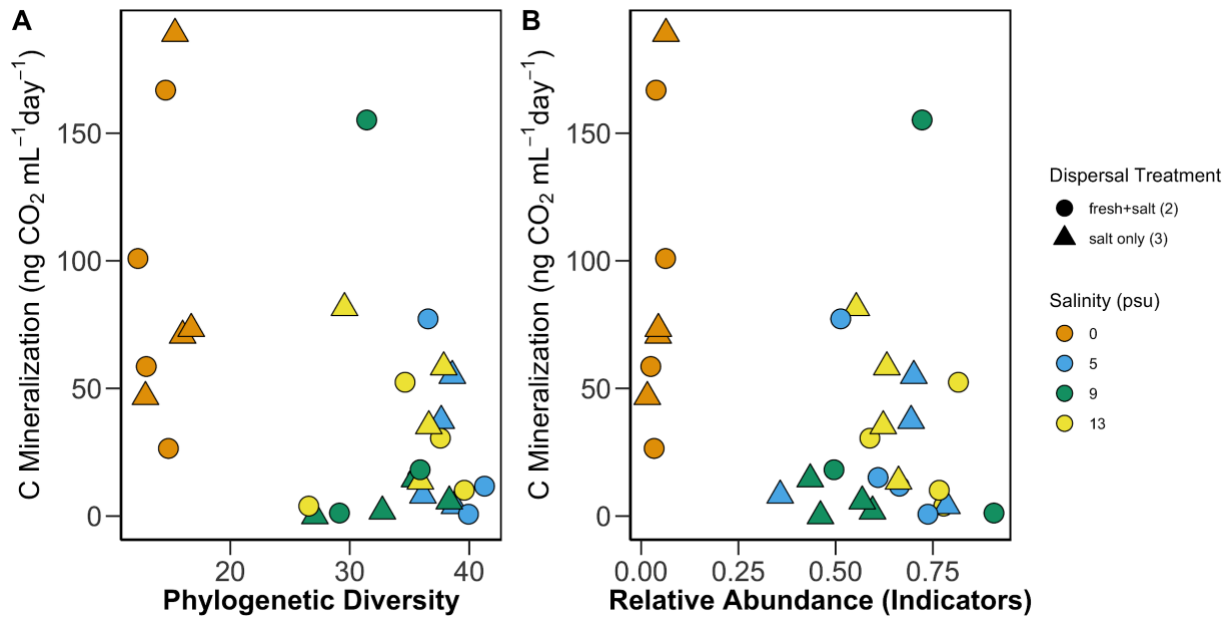

557

558

559

560

561

562

563

564

565

566

567

568

569

570
